# Supplementary material for: The Synergism of Platinum-Gold Bimetallic Nanoconjugates Enhances 5-Fluorouracil Delivery In Vitro
Source: MDPI journal article supplement (doi:10.3390/pharmaceutics11090439), 2019-09-01
Supplement: s1 [file s1]

# Supplementary Materials: The Synergism of Platinum-Gold Bimetallic Nanoconjugates Enhances 5-Fluorouracil Delivery in Vitro

Vareesh Maney and Moganavelli Singh

**Table S1.** Pharmacokinetic parameters of PACTF under stimulated conditions.

| Environment | Zero-order |       | First-order |       | Higuchi |        | Korsmeyer–Peppas |       |       |
|-------------|------------|-------|-------------|-------|---------|--------|------------------|-------|-------|
|             | $r^2$      | $K_0$ | $r^2$       | $K_1$ | $r^2$   | $K_H$  | $r^2$            | $K_k$ | $n$   |
| pH 7.4      | 0.998      | 1.598 | 0.956       | 0.019 | 0.986   | 6.539  | 0.964            | 3.847 | 0.701 |
| pH 6.5      | 0.998      | 3.028 | 0.997       | 0.044 | 0.993   | 12.183 | 0.924            | 4.388 | 0.877 |
| pH 5.0      | 0.997      | 3.455 | 0.990       | 0.054 | 0.985   | 13.908 | 0.934            | 6.545 | 0.789 |
| pH 4.5      | 0.997      | 4.077 | 0.966       | 0.071 | 0.959   | 16.709 | 0.966            | 7.486 | 0.806 |

$K_0$ ,  $K_1$ ,  $K_H$ , and  $K_k$  are release rate constants;  $r^2$  is the correlation coefficient; and  $n$  is release exponent (indicative of drug release mechanism).

**Table S2.** Pharmacokinetic parameters of CTF under stimulated conditions.

| Environment | Zero-order |       | First-order |        | Higuchi |        | Korsmeyer–Peppas |        |       |
|-------------|------------|-------|-------------|--------|---------|--------|------------------|--------|-------|
|             | $r^2$      | $K_0$ | $r^2$       | $K_1$  | $r^2$   | $K_H$  | $r^2$            | $K_k$  | $n$   |
| pH 7.4      | 0.998      | 1.917 | 0.908       | 0.023  | 0.945   | 7.871  | 0.953            | 4.175  | 0.741 |
| pH 6.5      | 0.998      | 3.818 | 0.899       | 0.062  | 0.916   | 15.823 | 0.965            | 9.637  | 0.693 |
| pH 5.0      | 0.996      | 4.133 | 0.923       | 0.072  | 0.925   | 17.101 | 0.966            | 10.298 | 0.697 |
| pH 4.5      | 0.996      | 4.457 | 0.913       | 0.0838 | 0.901   | 18.507 | 0.963            | 11.193 | 0.697 |

$K_0$ ,  $K_1$ ,  $K_H$ , and  $K_k$  are release rate constants;  $r^2$  is the correlation coefficient; and  $n$  is release exponent (indicative of drug release mechanism).
